# Supplementary material
Source: Royal Society of Chemistry journal article supplement (doi:10.1039/d6ce00109b)
Supplement: d6ce00109b1.pdf [file d6ce00109b1.pdf]

## Supplementary Information

### **Solid-Liquid Equilibria in the Aqueous Chiral Homophenylalanine System and Solid State Characterisation of the Racemic Species**

Axel Schultheis<sup>a</sup>, Klaus Merz<sup>b</sup>, Vico Tenberg<sup>a,c</sup>, and Heike Lorenz<sup>a,\*</sup>

<sup>a</sup>Max Planck Institute for Dynamics of Complex Technical Systems, Sandtorstrasse 1, 39106 Magdeburg, Germany. <sup>b</sup>Ruhr-Universität Bochum, Universitätsstr. 150, 44801 Bochum, Germany. <sup>c</sup>Otto von Guericke University, Universitätsplatz 2, 39106 Magdeburg, Germany. \*E-mail: lorenz@mpi-magdeburg.mpg.de

Table S 1 Measured enthalpies of the main endothermic peak of DL-HPA samples. Conversion from  $\text{J g}^{-1}$  to  $\text{kJ mol}^{-1}$  was conducted assuming a molar mass of  $179.22 \text{ g mol}^{-1}$ . The enthalpy of  $145 \pm 4 \text{ kJ mol}^{-1}$  reported in the article is the average of experimental runs 2 to 5 and the respective standard deviation of the population.

| DSC Run | $\Delta h$<br>$\text{J g}^{-1}$ | m<br>mg | $\Delta h$<br>$\text{kJ mol}^{-1}$ | remarks                                   |
|---------|---------------------------------|---------|------------------------------------|-------------------------------------------|
| 1       | 814.1                           | 3.08    | 145.9                              | as received, not considered               |
| 2       | 793.5                           | 9.19    | 142.2                              | obtained in binary solubility experiments |
| 3       | 790.2                           | 9.74    | 141.6                              | obtained in binary solubility experiments |
| 4       | 797.6                           | 10.19   | 142.9                              | obtained in binary solubility experiments |
| 5       | 848.7                           | 8.36    | 152.1                              | obtained in binary solubility experiments |

Table S 2 Measured temperature dependent solubilities of DL-HPA in water - individual data points.

| T<br>$^{\circ}\text{C}$ | Initial Weights   |                  | Equilibrated liquid                  |                                      |                                            | obtained phase |
|-------------------------|-------------------|------------------|--------------------------------------|--------------------------------------|--------------------------------------------|----------------|
|                         | $m_{DL-HPA}$<br>g | $m_{water}$<br>g | $w_{D-HPA}$<br>g/g <sub>liquid</sub> | $w_{L-HPA}$<br>g/g <sub>liquid</sub> | $w_{D-HPA+L-HPA}$<br>g/g <sub>liquid</sub> |                |
| 15                      | 0.01717           | 10.02003         | 0.000186                             | 0.000182                             | 0.000368                                   | DL-HPA         |
|                         | 0.01717           | 10.02003         | 0.000183                             | 0.000183                             | 0.000366                                   | DL-HPA         |
|                         | 0.01729           | 9.97658          | 0.000183                             | 0.000181                             | 0.000365                                   | DL-HPA         |
|                         | 0.01729           | 9.97658          | 0.000182                             | 0.000183                             | 0.000365                                   | DL-HPA         |
|                         | 0.01798           | 9.99704          | 0.000184                             | 0.000181                             | 0.000365                                   | DL-HPA         |
|                         | 0.01798           | 9.99704          | 0.000181                             | 0.000185                             | 0.000367                                   | DL-HPA         |
|                         | 0.01803           | 9.99668          | 0.000179                             | 0.000182                             | 0.000361                                   | DL-HPA         |
|                         | 0.01803           | 9.99668          | 0.000185                             | 0.000182                             | 0.000367                                   | DL-HPA         |
| 25                      | 0.01777           | 9.98825          | 0.000247                             | 0.000244                             | 0.000491                                   | DL-HPA         |
|                         | 0.01777           | 9.98825          | 0.000247                             | 0.000243                             | 0.000490                                   | DL-HPA         |
|                         | 0.01754           | 9.98046          | 0.000251                             | 0.000244                             | 0.000495                                   | DL-HPA         |
|                         | 0.01754           | 9.98046          | 0.000252                             | 0.000245                             | 0.000497                                   | DL-HPA         |
|                         | 0.01786           | 10.0943          | 0.000256                             | 0.000244                             | 0.000500                                   | DL-HPA         |
|                         | 0.01786           | 10.0943          | 0.000254                             | 0.000247                             | 0.000501                                   | DL-HPA         |
|                         | 0.01795           | 9.99318          | 0.000229                             | 0.000235                             | 0.000464                                   | DL-HPA         |
|                         | 0.01795           | 9.99318          | 0.000230                             | 0.000230                             | 0.000460                                   | DL-HPA         |
| 34.9                    | 0.01675           | 9.97054          | 0.000331                             | 0.000325                             | 0.000656                                   | DL-HPA         |
|                         | 0.01675           | 9.97054          | 0.000337                             | 0.000324                             | 0.000661                                   | DL-HPA         |
|                         | 0.01725           | 9.98062          | 0.000332                             | 0.000318                             | 0.000650                                   | DL-HPA         |
|                         | 0.01725           | 9.98062          | 0.000330                             | 0.000326                             | 0.000656                                   | DL-HPA         |
|                         | 0.01792           | 9.96631          | 0.000333                             | 0.000320                             | 0.000653                                   | DL-HPA         |
|                         | 0.01792           | 9.96631          | 0.000327                             | 0.000327                             | 0.000654                                   | DL-HPA         |
|                         | 0.01788           | 9.98064          | 0.000338                             | 0.000324                             | 0.000662                                   | DL-HPA         |
|                         | 0.01788           | 9.98064          | 0.000325                             | 0.000316                             | 0.000641                                   | DL-HPA         |
| 44.9                    | 0.01635           | 10.05703         | 0.000444                             | 0.000435                             | 0.000878                                   | DL-HPA         |
|                         | 0.01635           | 10.05703         | 0.000441                             | 0.000426                             | 0.000868                                   | DL-HPA         |
|                         | 0.01772           | 10.07448         | 0.000436                             | 0.000433                             | 0.000869                                   | DL-HPA         |
|                         | 0.01772           | 10.07448         | 0.000442                             | 0.000432                             | 0.000874                                   | DL-HPA         |
|                         | 0.01606           | 10.06214         | 0.000434                             | 0.000425                             | 0.000859                                   | DL-HPA         |
|                         | 0.01606           | 10.06214         | 0.000440                             | 0.000430                             | 0.000870                                   | DL-HPA         |
|                         | 0.01707           | 10.01207         | 0.000437                             | 0.000422                             | 0.000859                                   | DL-HPA         |
|                         | 0.01707           | 10.01207         | 0.000438                             | 0.000429                             | 0.000868                                   | DL-HPA         |
| 55.1                    | 0.01581           | 9.99297          | 0.000590                             | 0.000567                             | 0.001157                                   | DL-HPA         |
|                         | 0.01581           | 9.99297          | 0.000592                             | 0.000568                             | 0.001160                                   | DL-HPA         |
|                         | 0.01801           | 9.9888           | 0.000565                             | 0.000543                             | 0.001109                                   | DL-HPA         |
|                         | 0.01801           | 9.9888           | 0.000567                             | 0.000547                             | 0.001114                                   | DL-HPA         |
|                         | 0.01856           | 9.99328          | 0.000570                             | 0.000551                             | 0.001121                                   | DL-HPA         |
|                         | 0.01856           | 9.99328          | 0.000570                             | 0.000551                             | 0.001121                                   | DL-HPA         |
|                         | 0.01609           | 10.03679         | 0.000551                             | 0.000533                             | 0.001085                                   | DL-HPA         |
|                         | 0.01609           | 10.03679         | 0.000551                             | 0.000529                             | 0.001080                                   | DL-HPA         |

Table S 3 Averaged temperature dependent solubilities of DL-HPA in water. Uncertainty is represented by the standard deviation of the population

| T<br>°C | Equilibrated liquid                                              | obtained phase |
|---------|------------------------------------------------------------------|----------------|
|         | $w_{D-HPA+L-HPA}$<br>g/g <sub>liquid</sub> g/g <sub>liquid</sub> |                |
| 15      | 0.000365 ± 0.000002                                              | DL-HPA         |
| 25      | 0.000487 ± 0.000015                                              | DL-HPA         |
| 34.9    | 0.000654 ± 0.000006                                              | DL-HPA         |
| 44.9    | 0.000868 ± 0.000006                                              | DL-HPA         |
| 55.1    | 0.001118 ± 0.000027                                              | DL-HPA         |

Table S 4 Experimental details in the test on the stable phase in equilibrium at 25 °C.

| T<br>°C | Initial Weights  |                   |                  |                  | Equilibrated liquid                  |                                      | Equilibrated solid                  |                                     | obtained phase |
|---------|------------------|-------------------|------------------|------------------|--------------------------------------|--------------------------------------|-------------------------------------|-------------------------------------|----------------|
|         | $m_{L-HPA}$<br>g | $m_{DL-HPA}$<br>g | $m_{D-HPA}$<br>g | $m_{water}$<br>g | $w_{D-HPA}$<br>g/g <sub>liquid</sub> | $w_{L-HPA}$<br>g/g <sub>liquid</sub> | $w_{D-HPA}$<br>g/g <sub>solid</sub> | $w_{L-HPA}$<br>g/g <sub>solid</sub> |                |
| 25      | 0.000            | 0.035             | 0.000            | 30.191           | 0.00024                              | 0.00023                              | 0.51                                | 0.49                                | DL-HPA         |
| 25      | 0.018            | 0.000             | 0.019            | 30.526           | 0.00032                              | 0.00020                              | 0.51                                | 0.49                                | DL-HPA         |

Table S 5 SLE data in the D-HPA /L-HPA /water system at 25 °C and 55 °C. Note the column  $w_{L-HPA}^*$ , where the respective unit is g/g<sub>solvent-free-liquid</sub>, and the sample marked with <sup>+</sup> where an experimental error is likely due to two solid phases while only pure L-HPA was determined in the respective HPLC measurement of the solid. Further, note the value marked with <sup>◊</sup>, where the not enough solid for solid phase analysis was obtained after equilibration. Therefore, this data point was excluded from further interpretation.

| T<br>°C | Initial Weights  |                   |                  |                  | Equilibrated liquid                  |                                      |                                    | Equilibrated solid                  |                                     | obtained phases             |
|---------|------------------|-------------------|------------------|------------------|--------------------------------------|--------------------------------------|------------------------------------|-------------------------------------|-------------------------------------|-----------------------------|
|         | $m_{L-HPA}$<br>g | $m_{DL-HPA}$<br>g | $m_{D-HPA}$<br>g | $m_{water}$<br>g | $w_{D-HPA}$<br>g/g <sub>liquid</sub> | $w_{L-HPA}$<br>g/g <sub>liquid</sub> | $w_{L-HPA}^*$<br>g/g <sub>sl</sub> | $w_{D-HPA}$<br>g/g <sub>solid</sub> | $w_{L-HPA}$<br>g/g <sub>solid</sub> |                             |
| 25      | 0.0251           | 0.0000            | 0.0000           | 10.0576          | 0.00000                              | 0.00073                              | 1.00                               | 0.00                                | 1.00                                | L-HPA                       |
|         | 0.0241           | 0.0000            | 0.0038           | 10.1095          | 0.00011                              | 0.00076                              | 0.88                               | 0.18                                | 0.82                                | L-HPA + DL-HPA              |
|         | 0.0215           | 0.0000            | 0.0060           | 10.0091          | 0.00009                              | 0.00074                              | 0.89                               | 0.26                                | 0.74                                | L-HPA + DL-HPA              |
|         | 0.0170           | 0.0000            | 0.0071           | 10.1038          | 0.00014                              | 0.00076                              | 0.84                               | 0.41                                | 0.59                                | L-HPA + DL-HPA              |
|         | 0.0134           | 0.0000            | 0.0090           | 10.0972          | 0.00015                              | 0.00060                              | 0.80                               | 0.50                                | 0.50                                | DL-HPA                      |
|         | 0.0080           | 0.0000            | 0.0081           | 10.0083          | 0.00028                              | 0.00027                              | 0.49                               | 0.49                                | 0.51                                | DL-HPA                      |
|         | 0.0092           | 0.0000            | 0.0129           | 10.1159          | 0.00048                              | 0.00016                              | 0.25                               | 0.50                                | 0.50                                | DL-HPA                      |
|         | 0.0067           | 0.0000            | 0.0170           | 10.1156          | 0.00082                              | 0.00011                              | 0.12                               | 0.59                                | 0.41                                | DL-HPA + D-HPA              |
|         | 0.0049           | 0.0000            | 0.0206           | 10.1260          | 0.00076                              | 0.00011                              | 0.12                               | 0.74                                | 0.26                                | DL-HPA + D-HPA              |
|         | 0.0029           | 0.0000            | 0.0243           | 10.0460          | 0.00080                              | 0.00011                              | 0.12                               | 0.86                                | 0.14                                | DL-HPA + D-HPA              |
|         | 0.0000           | 0.0000            | 0.0251           | 10.1463          | 0.00070                              | 0.00000                              | 0.00                               | 1.00                                | 0.00                                | D-HPA                       |
|         | 0.0234           | 0.0000            | 0.0000           | 10.0219          | 0.00000                              | 0.00075                              | 1.00                               | 0.00                                | 1.00                                | L-HPA                       |
|         | 0.0187           | 0.0039            | 0.0000           | 7.9881           | 0.00006                              | 0.00081                              | 0.93                               | 0.03                                | 0.97                                | L-HPA + DL-HPA              |
|         | 0.0207           | 0.0069            | 0.0000           | 9.7140           | 0.00008                              | 0.00074                              | 0.91                               | 0.11                                | 0.89                                | L-HPA + DL-HPA              |
|         | 0.0151           | 0.0132            | 0.0000           | 9.9582           | 0.00006                              | 0.00077                              | 0.93                               | 0.23                                | 0.77                                | L-HPA + DL-HPA              |
|         | 0.0156           | 0.0113            | 0.0000           | 9.9776           | 0.00008                              | 0.00079                              | 0.91                               | 0.20                                | 0.80                                | L-HPA + DL-HPA              |
|         | 0.0091           | 0.0157            | 0.0000           | 9.9680           | 0.00007                              | 0.00080                              | 0.92                               | 0.40                                | 0.60                                | L-HPA + DL-HPA              |
|         | 0.0119           | 0.0186            | 0.0000           | 9.9616           | 0.00006                              | 0.00076                              | 0.93                               | 0.32                                | 0.68                                | L-HPA + DL-HPA              |
|         | 0.0085           | 0.0203            | 0.0000           | 10.0403          | 0.00005                              | 0.00077                              | 0.94                               | 0.43                                | 0.57                                | L-HPA + DL-HPA              |
|         | 0.0000           | 0.0267            | 0.0000           | 9.9689           | 0.00023                              | 0.00024                              | 0.51                               | 0.48                                | 0.52                                | DL-HPA                      |
| 54.9    | 0.0250           | 0.0000            | 0.0000           | 10.0166          | 0.00000                              | 0.00148                              | 1.00                               | 0.00                                | 1.00                                | L-HPA                       |
|         | 0.0240           | 0.0000            | 0.0032           | 10.0004          | 0.00031                              | 0.00149                              | 0.83                               | 0.00                                | 1.00                                | L-HPA + DL-HPA <sup>+</sup> |
|         | 0.0213           | 0.0000            | 0.0049           | 10.3324          | 0.00027                              | 0.00166                              | 0.86                               | 0.30                                | 0.70                                | L-HPA + DL-HPA              |
|         | 0.0175           | 0.0000            | 0.0072           | 10.0188          | 0.00035                              | 0.00138                              | 0.80                               | 0.52                                | 0.48                                | L-HPA + DL-HPA              |
|         | 0.0129           | 0.0000            | 0.0089           | 10.0308          | 0.00046                              | 0.00089                              | 0.66                               | 0.49                                | 0.51                                | DL-HPA                      |
|         | 0.0090           | 0.0000            | 0.0135           | 9.9969           | 0.00086                              | 0.00044                              | 0.34                               | 0.49                                | 0.51                                | DL-HPA + D-HPA              |
|         | 0.0073           | 0.0000            | 0.0171           | 10.0509          | 0.00123                              | 0.00032                              | 0.21                               | 0.48                                | 0.52                                | DL-HPA                      |
|         | 0.0049           | 0.0000            | 0.0210           | 10.0213          | 0.00149                              | 0.00030                              | 0.17                               | 0.77                                | 0.23                                | DL-HPA + D-HPA              |
|         | 0.0030           | 0.0000            | 0.0240           | 10.0174          | 0.00155                              | 0.00029                              | 0.16                               | 0.98                                | 0.02                                | D-HPA                       |
|         | 0.0000           | 0.0000            | 0.0253           | 10.0149          | 0.00143                              | 0.00000                              | 0.00                               | 1.00                                | 0.00                                | D-HPA                       |
| 55      | 0.0210           | 0.0000            | 0.0000           | 9.9953           | 0.00000                              | 0.00160                              | 1.00                               | 0.00                                | 1.00                                | L-HPA                       |
|         | 0.0188           | 0.0035            | 0.0000           | 10.0085          | 0.00014                              | 0.00164                              | 0.92                               | 0.00                                | 1.00                                | L-HPA                       |
|         | 0.0132           | 0.0100            | 0.0000           | 10.0419          | 0.00025                              | 0.00157                              | 0.86                               | 0.36                                | 0.64                                | L-HPA + DL-HPA              |
|         | 0.0127           | 0.0112            | 0.0000           | 9.9642           | 0.00026                              | 0.00155                              | 0.86                               | 0.46                                | 0.54                                | L-HPA + DL-HPA              |
|         | 0.0083           | 0.0152            | 0.0000           | 9.9855           | 0.00032                              | 0.00119                              | 0.79                               | 0.45                                | 0.55                                | L-HPA + DL-HPA              |
|         | 0.0085           | 0.0170            | 0.0000           | 10.0211          | 0.00029                              | 0.00124                              | 0.81                               | 0.47                                | 0.53                                | DL-HPA                      |
|         | 0.0063           | 0.0190            | 0.0000           | 10.0196          | 0.00034                              | 0.00102                              | 0.75                               | 0.49                                | 0.51                                | L-HPA + DL-HPA              |
|         | 0.0000           | 0.0260            | 0.0000           | 10.0120          | 0.00056                              | 0.00060                              | 0.51                               | 0.47                                | 0.53                                | DL-HPA                      |
|         | 0.0000           | 0.0207            | 0.0000           | 10.0272          | 0.00057                              | 0.00057                              | 0.50                               | 0.49                                | 0.51                                | DL-HPA                      |
| 54.9    | 0.0082           | 0.0000            | 0.0079           | 10.0099          | 0.00068                              | 0.00076                              | 0.53                               |                                     |                                     | ◊                           |

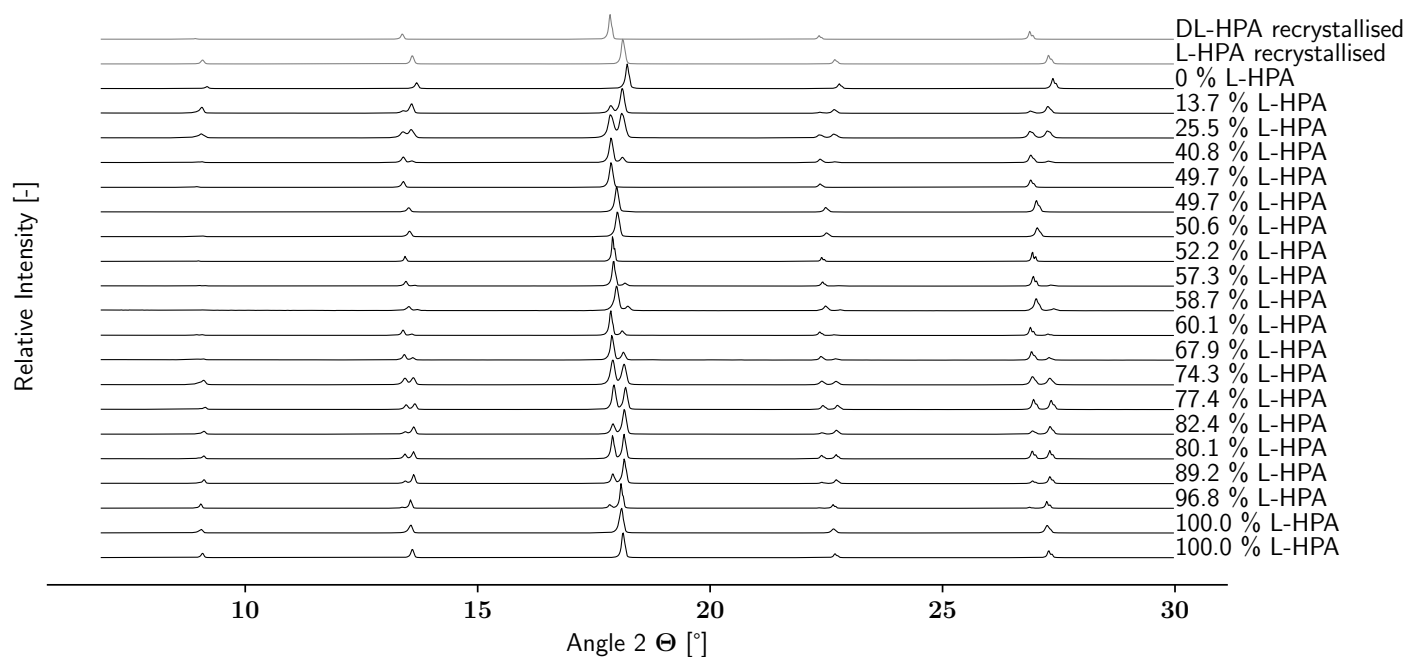

Figure S 1 PXR D patterns of solid phase samples from the SLE determination at 25 °C. Concentrations are given as wt.% in the solid

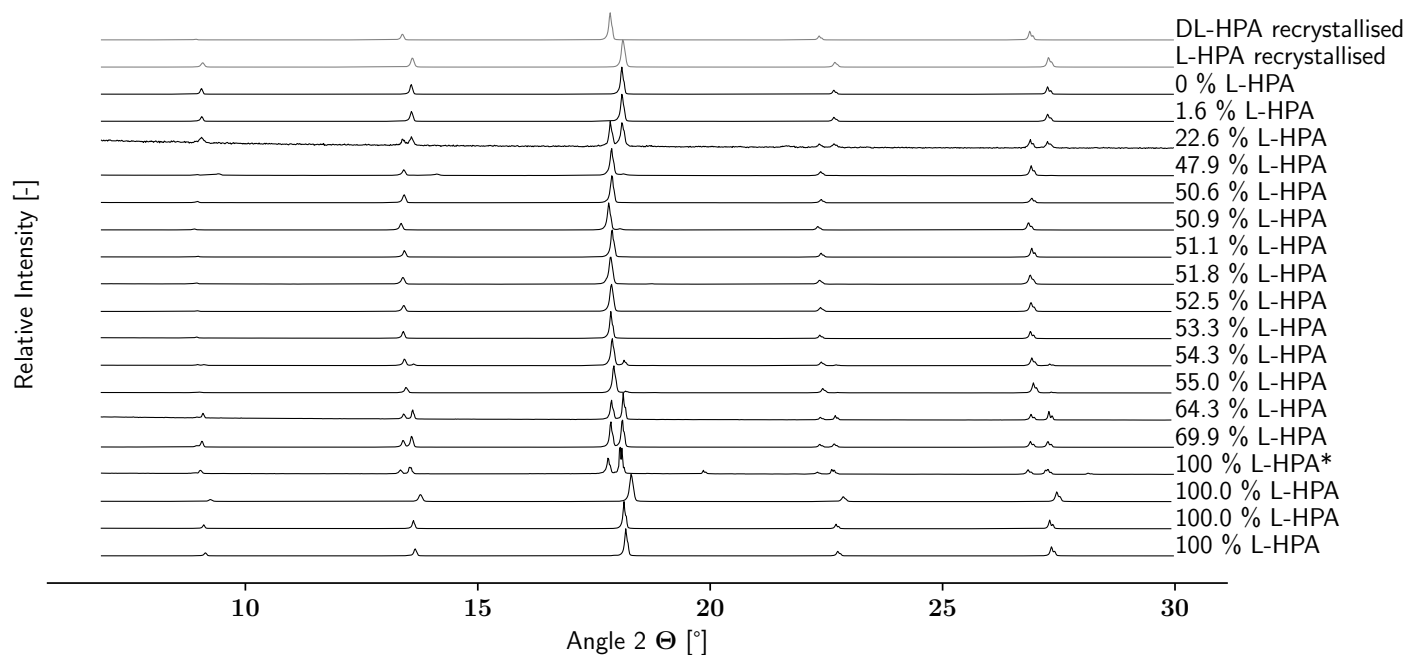

Figure S 2 PXR D patterns of solid phase samples from the SLE determination at 55 °C. Concentrations are given as wt.% in the solid. Note the line marked with \*: only L-HPA was found in the HPLC analysis of the solid, while the pattern shows a mechanical mixture between L-HPA and DL-HPA. The respective sample had an initial solvent-free D-HPA content of around 12 wt.%. We assume an experimental error and have excluded this datapoint from further interpretation.
